# Supplementary material for: Mendelian Randomisation Confirms the Role of Y-Chromosome Loss in Alzheimer’s Disease Aetiopathogenesis in Men
Source: MDPI journal article supplement (doi:10.3390/ijms24020898), 2023-01-04

**Figure S2. Analysis of batch effect in mLOY calling.**

We tested a linear model using batch and age at extraction as predictors of mLRR-Y (continuous mLOY parameter).

|       | Beta                  | SE                   | P                     |
|-------|-----------------------|----------------------|-----------------------|
| Batch | $-6.02 \cdot 10^{-3}$ | $5.17 \cdot 10^{-3}$ | 0.24                  |
| Age   | $3.57 \cdot 10^{-3}$  | $2.75 \cdot 10^{-4}$ | $1.39 \cdot 10^{-37}$ |

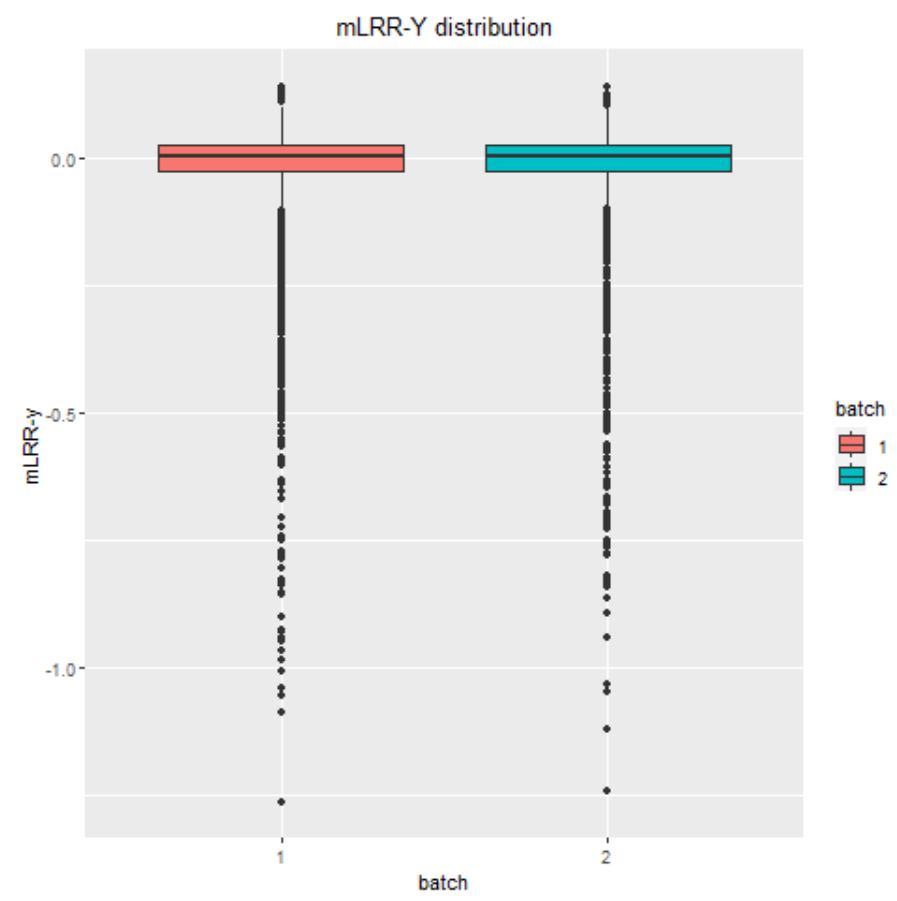

Supplement: s1 [file s1]
