# Supplementary material for: Mendelian Randomisation Confirms the Role of Y-Chromosome Loss in Alzheimer’s Disease Aetiopathogenesis in Men
Source: MDPI journal article supplement (doi:10.3390/ijms24020898), 2023-01-04
Supplement: s1 [file s1]

**Table S5. Logistic regression results for mloy-PRS, age at sampling and APOE genotype (independent variables) versus mLOY status (dependent variable).** Only males aged 65-85 were included in the models. OR, odds ratio; SE, standard error; CI2.5, 2.5% quantile; CI97.5, 97.5% quantile.

|                 | OR   | SE   | Z     | p                     | CI2.5 | CI97.5 |
|-----------------|------|------|-------|-----------------------|-------|--------|
| mLOY PRS        | 1.80 | 1.07 | 9.18  | $4.22 \cdot 10^{-20}$ | 0.46  | 0.72   |
| Age at sampling | 1.08 | 1.01 | 6.57  | $5.07 \cdot 10^{-11}$ | 0.06  | 0.10   |
| APOE            | 0.88 | 1.09 | -1.45 | 0.15                  | -0.30 | 0.04   |
