# Supplementary material for: Mendelian Randomisation Confirms the Role of Y-Chromosome Loss in Alzheimer’s Disease Aetiopathogenesis in Men
Source: MDPI journal article supplement (doi:10.3390/ijms24020898), 2023-01-04
Supplement: s1 [file s1]

**Table S12. Cox proportional-hazards model results for PCs association to conversion from MCI to dementia in prospective individuals with MCI from the GR@ACE-DEGESCO cohort.** HR, hazard ratio; SE, standard error, CI2.5, 2.5% quantile; CI97.5, 97.5% quantile.

|     | log(HR) | HR   | SE   | Z     | P    | CI2.5  | CI97.5 |
|-----|---------|------|------|-------|------|--------|--------|
| PC1 | -4.28   | 0.01 | 3.92 | -1.09 | 0.27 | -11.96 | 3.39   |
| PC2 | -1.38   | 0.25 | 1.46 | -0.94 | 0.35 | -4.24  | 1.49   |
| PC3 | -0.48   | 0.62 | 1.65 | -0.29 | 0.77 | -3.72  | 2.76   |
| PC4 | -0.36   | 0.70 | 1.48 | -0.24 | 0.81 | -3.25  | 2.54   |
