# Supplementary material for: Mendelian Randomisation Confirms the Role of Y-Chromosome Loss in Alzheimer’s Disease Aetiopathogenesis in Men
Source: MDPI journal article supplement (doi:10.3390/ijms24020898), 2023-01-04
Supplement: s1 [file s1]

**Table S11. Sample contribution by centre to the complete GR@ACE-DEGESCO cohort and different sub analysis selections.**

| Center                                          | Source of DNA | GR@ACE-DEGESCO | PRS case-control | mLOY case-control                          | mLOY case-control<br>(age 65-85)       |
|-------------------------------------------------|---------------|----------------|------------------|--------------------------------------------|----------------------------------------|
| ACE Alzheimer Center Barcelona                  | Blood         | 8722           | 4926             | 2286                                       | 1552                                   |
| Banco Nacional de ADN                           | Blood         | 3738           | 307              |                                            |                                        |
| Centro de Biología Molecular Severo Ochoa       | Blood         | 23             | 21               |                                            |                                        |
| Fundación CIEN                                  | Blood         | 1322           | 904              | 411                                        | 392                                    |
| HRC                                             | Blood         | 38             | 25               |                                            |                                        |
| Hospital Universitario Central de Asturias      | Blood         | 195            | 148              |                                            |                                        |
| Hospital Universitario de Valme                 | Blood         | 1022           | 30               |                                            |                                        |
| IBIS                                            | Blood         | 1005           | 445              |                                            |                                        |
| IRBLleida                                       | Blood         | 230            | 160              |                                            |                                        |
| Mutua de Terrassa                               | Blood         | 247            | 153              |                                            |                                        |
| Universidad de Málaga                           | Saliva        | 408            | 78               |                                            |                                        |
| Hospital Universitario de Marqués de Valdecilla | Blood         | 298            | 72               |                                            |                                        |
| INCLUSION CRITERIA:                             |               |                | • Age 65-85      | • Age at DNA sampling available<br>• Males | • Age at DNA sampling 65-85<br>• Males |
