# Supplementary material for: Mendelian Randomisation Confirms the Role of Y-Chromosome Loss in Alzheimer’s Disease Aetiopathogenesis in Men
Source: MDPI journal article supplement (doi:10.3390/ijms24020898), 2023-01-04
Supplement: s1 [file s1]

**Table S3. Logistic regression results for PC association with the AD case-control variable in the mLOY/mLRR-Y case-control analysis.** Only individuals with age at extraction 65-85 years old were included in the models. OR, odds ratio; SE, standard error; CI2.5, 2.5% quantile; CI97.5, 97.5% quantile.

|            | <b>log(OR)</b> | <b>SE</b> | <b>Z</b> | <b>P</b> | <b>CI2.5</b> | <b>CI97.5</b> |
|------------|----------------|-----------|----------|----------|--------------|---------------|
| <b>PC1</b> | -5.93          | 2.81      | -2.11    | 0.03     | -11.44       | -0.41         |
| <b>PC2</b> | -5.75          | 2.88      | -2.00    | 0.05     | -11.40       | -0.11         |
| <b>PC3</b> | 3.78           | 3.04      | 1.24     | 0.21     | -2.17        | 9.75          |
| <b>PC4</b> | -2.61          | 3.69      | -0.71    | 0.48     | -9.85        | 4.62          |
