# Supplementary material for: Mendelian Randomisation Confirms the Role of Y-Chromosome Loss in Alzheimer’s Disease Aetiopathogenesis in Men
Source: MDPI journal article supplement (doi:10.3390/ijms24020898), 2023-01-04
Supplement: s1 [file s1]

**Table S1. Age and sample size of the case and control populations in the GR@ACE-DEGESCO cohort before and after age filtering.**  
Only samples with available age at DNA extraction were considered. SD, Standard Deviation.

|                           | N total | N group | Age total;<br>Mean (SD) | Age groups;<br>Mean (SD) |         |
|---------------------------|---------|---------|-------------------------|--------------------------|---------|
| All cases and<br>controls | 2697    | 906     | 75.5 (9.5)              | 68.7 (9.1)               | Control |
|                           |         | 1791    |                         | 79.0 (7.7)               | AD      |
| Age 65-85                 | 1944    | 624     | 76.4                    | 73.5 (4.6)               | Control |
|                           |         | 1320    |                         | 77.8 (4.8)               | AD      |
