# Supplementary material for: Mendelian Randomisation Confirms the Role of Y-Chromosome Loss in Alzheimer’s Disease Aetiopathogenesis in Men
Source: MDPI journal article supplement (doi:10.3390/ijms24020898), 2023-01-04
Supplement: s1 [file s1]

**Table S2. ANCOVA adjusted by age at sampling and APOE genotype, using the case-control variable as an independent variable and mLRR-Y as the dependent variable.** Only individuals with available age at DNA sampling information were included in the analysis. Df, degrees of freedom; Sum Sq, sum of squares; Mean Sq, mean squares.

|                    | Df   | Sum Sq | Mean Sq | F value | Pr(>F)   |
|--------------------|------|--------|---------|---------|----------|
| Case-control (1/0) | 1    | 1.54   | 1.54    | 67.99   | 2.54E-16 |
| Age at sampling    | 1    | 1.84   | 1.84    | 81.22   | 3.73E-19 |
| APOE               | 1    | 0.09   | 0.09    | 3.86    | 4.94E-02 |
| Residuals          | 2693 | 61.14  | 0.02    |         |          |
