# Supplementary material for: Mendelian Randomisation Confirms the Role of Y-Chromosome Loss in Alzheimer’s Disease Aetiopathogenesis in Men
Source: MDPI journal article supplement (doi:10.3390/ijms24020898), 2023-01-04

**Figure S3. Flow chart describing QC and filtering steps prior to case-control and disease progression analysis, depending on the use of mLOY phenotype or mloy-PRS as the independent variable.**

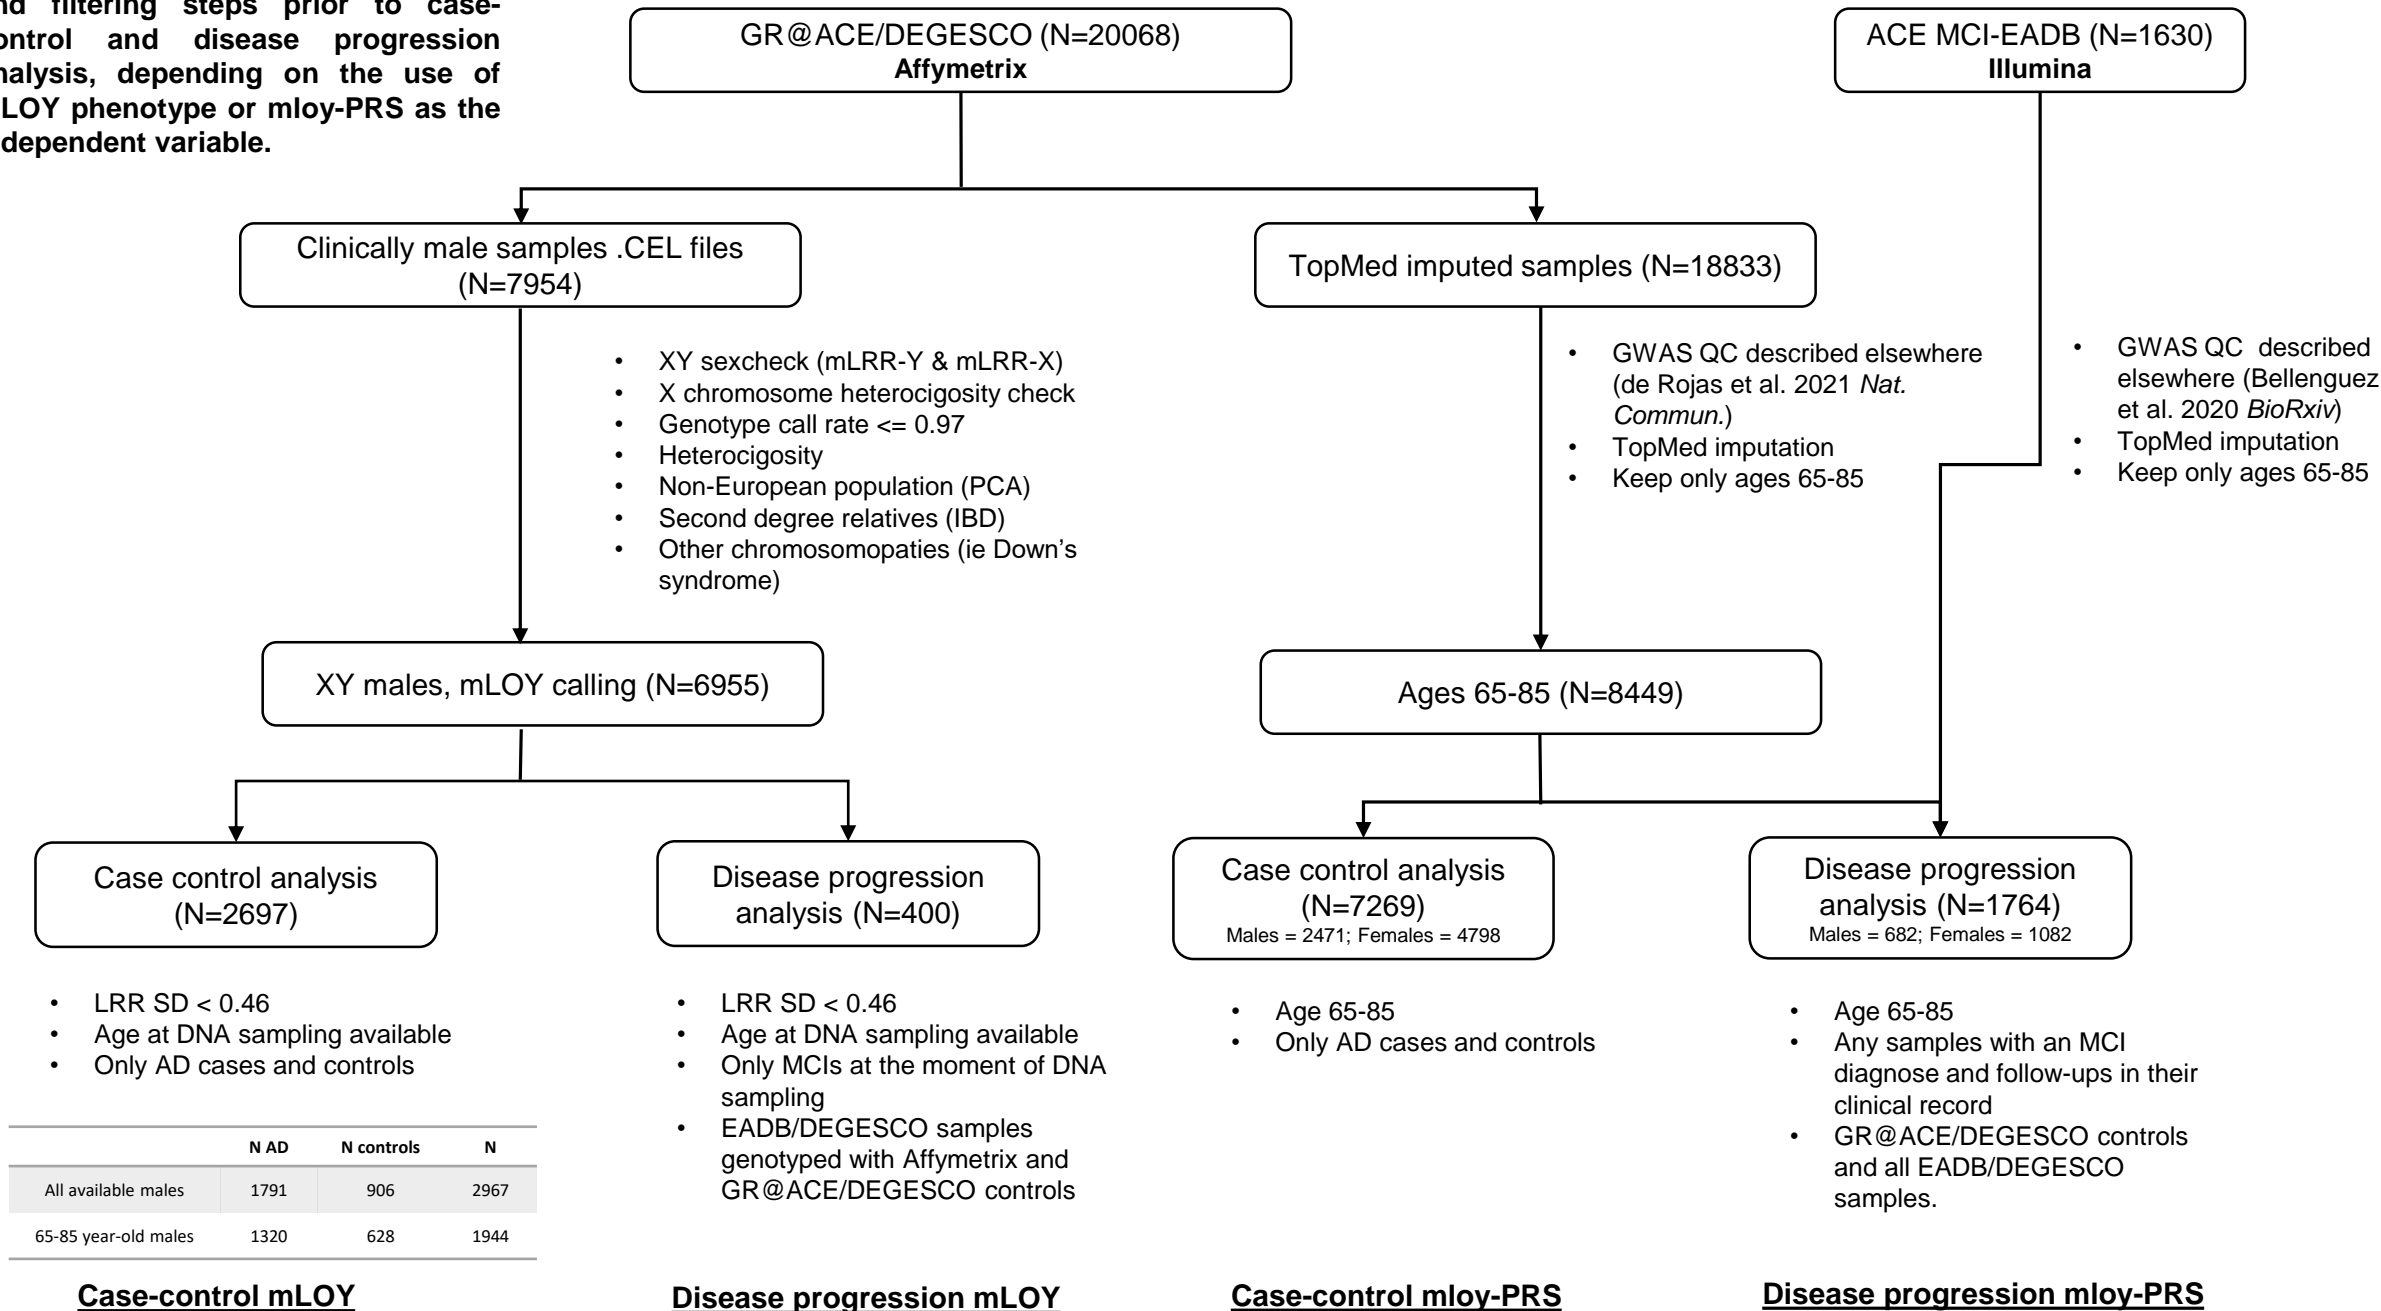

Supplement: s1 [file s1]
