# Supplementary material for: Mendelian Randomisation Confirms the Role of Y-Chromosome Loss in Alzheimer’s Disease Aetiopathogenesis in Men
Source: MDPI journal article supplement (doi:10.3390/ijms24020898), 2023-01-04

**Figure S8.** Heatmap displaying Pearson correlation coefficients (R) for total tau, p-tau and CSF proteins measured with Olink Neurology (a) and Inflammation (b) panels. Olink NPX values were normalized (mean=0, SD=1) prior to computing R values.

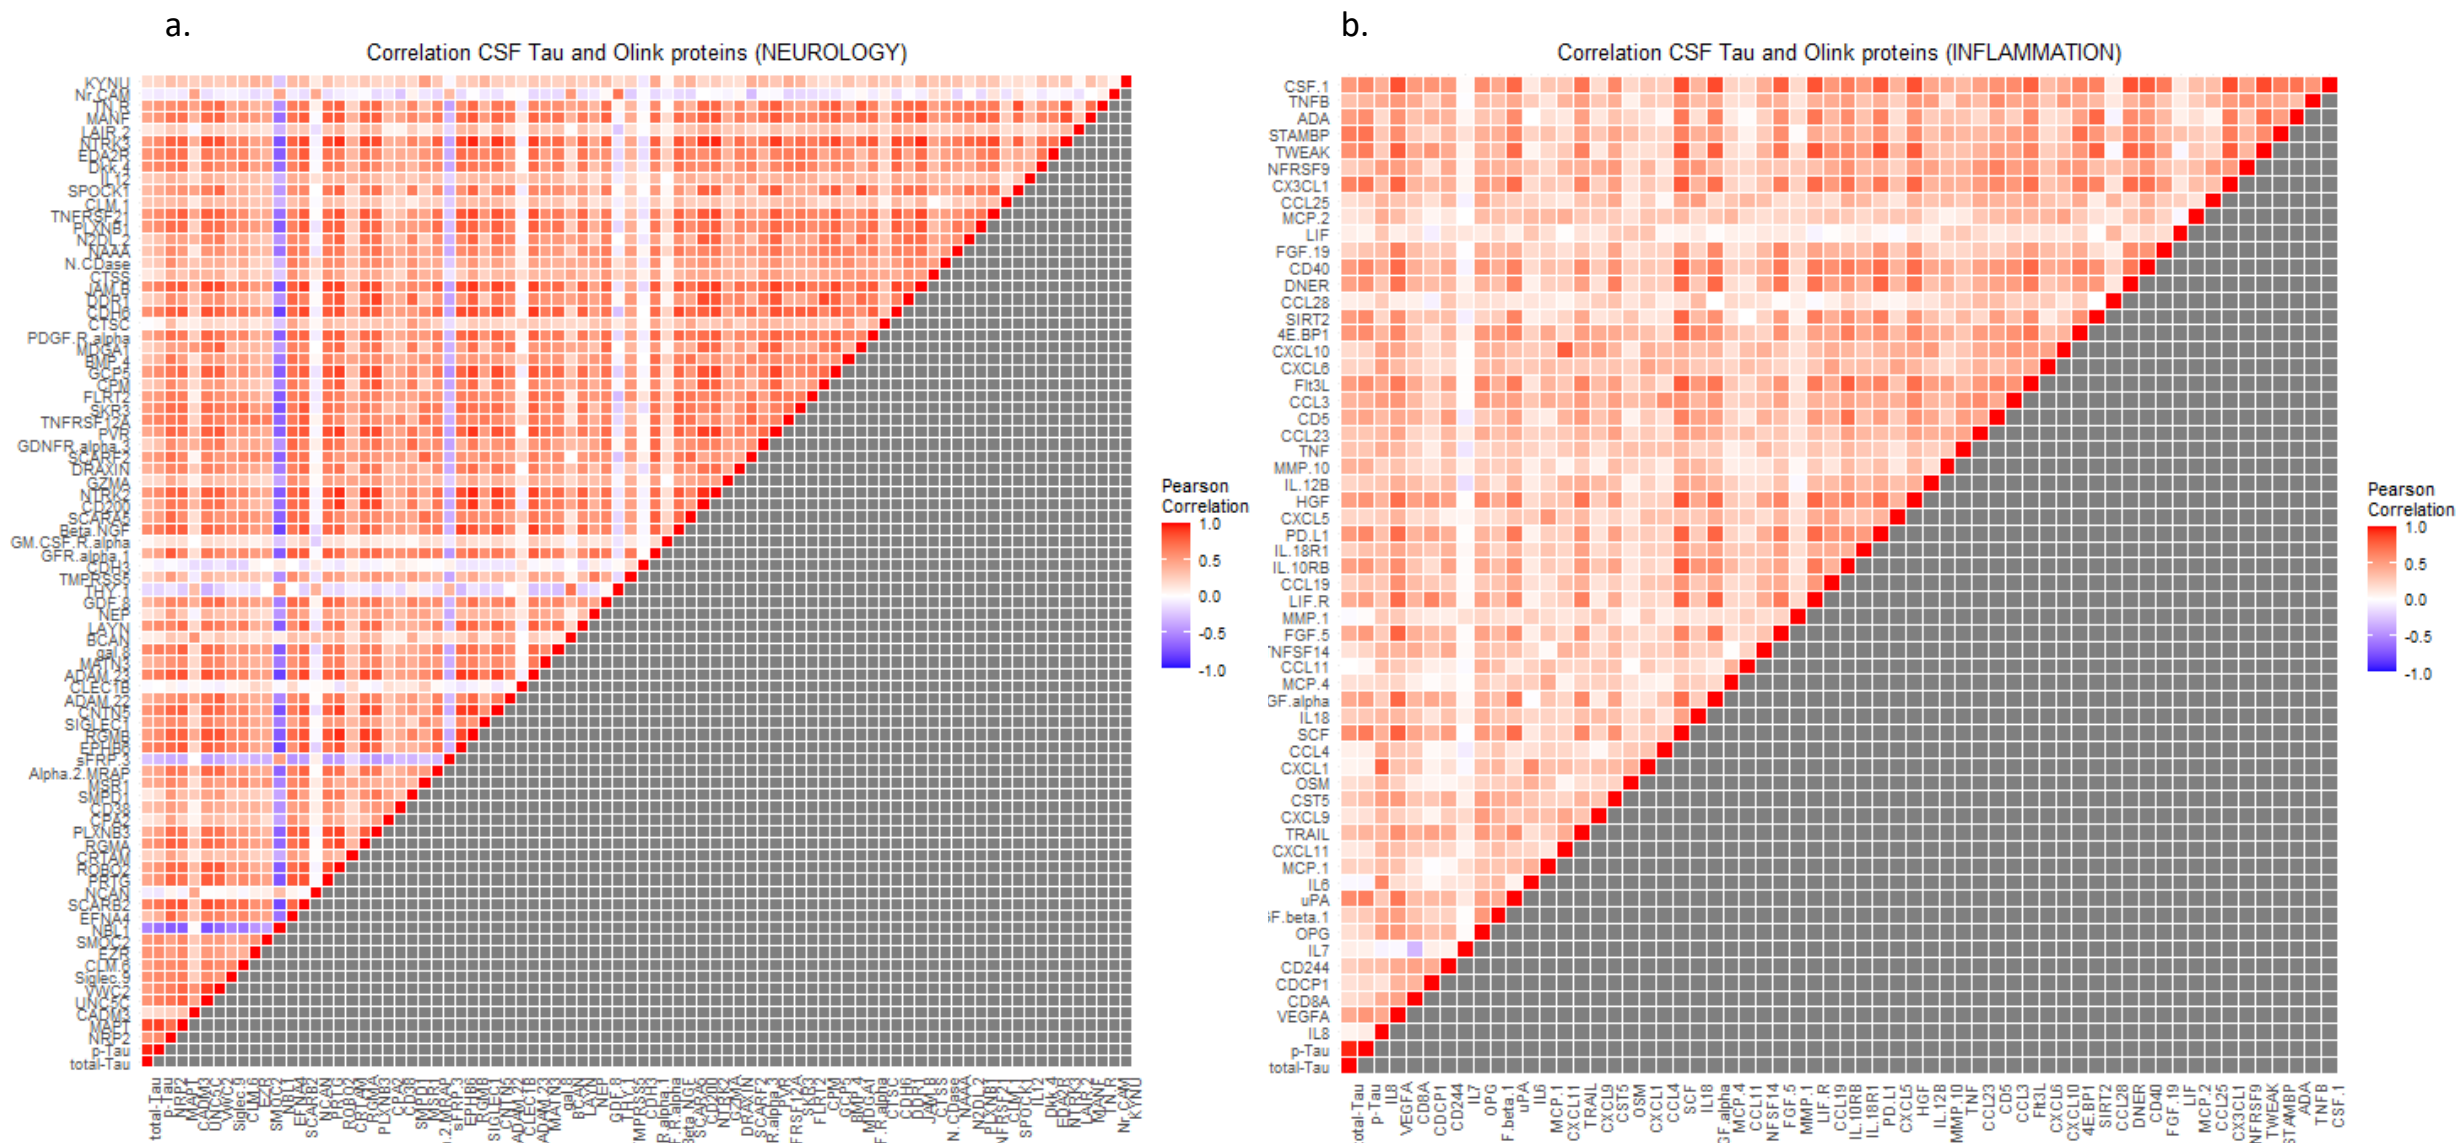

Supplement: s1 [file s1]
