# Supplementary material for: Mendelian Randomisation Confirms the Role of Y-Chromosome Loss in Alzheimer’s Disease Aetiopathogenesis in Men
Source: MDPI journal article supplement (doi:10.3390/ijms24020898), 2023-01-04

**Figure S7. Association between PCs and conversion from MCI to dementia (PRS analysis).** PC1 is highly associated to AD, but in fact represents genotyping chip/cohort ascertainment as shown. Thus, PC1 was not included in the models, as we already adjusted our data by genotyping chip/cohort ascertainment.

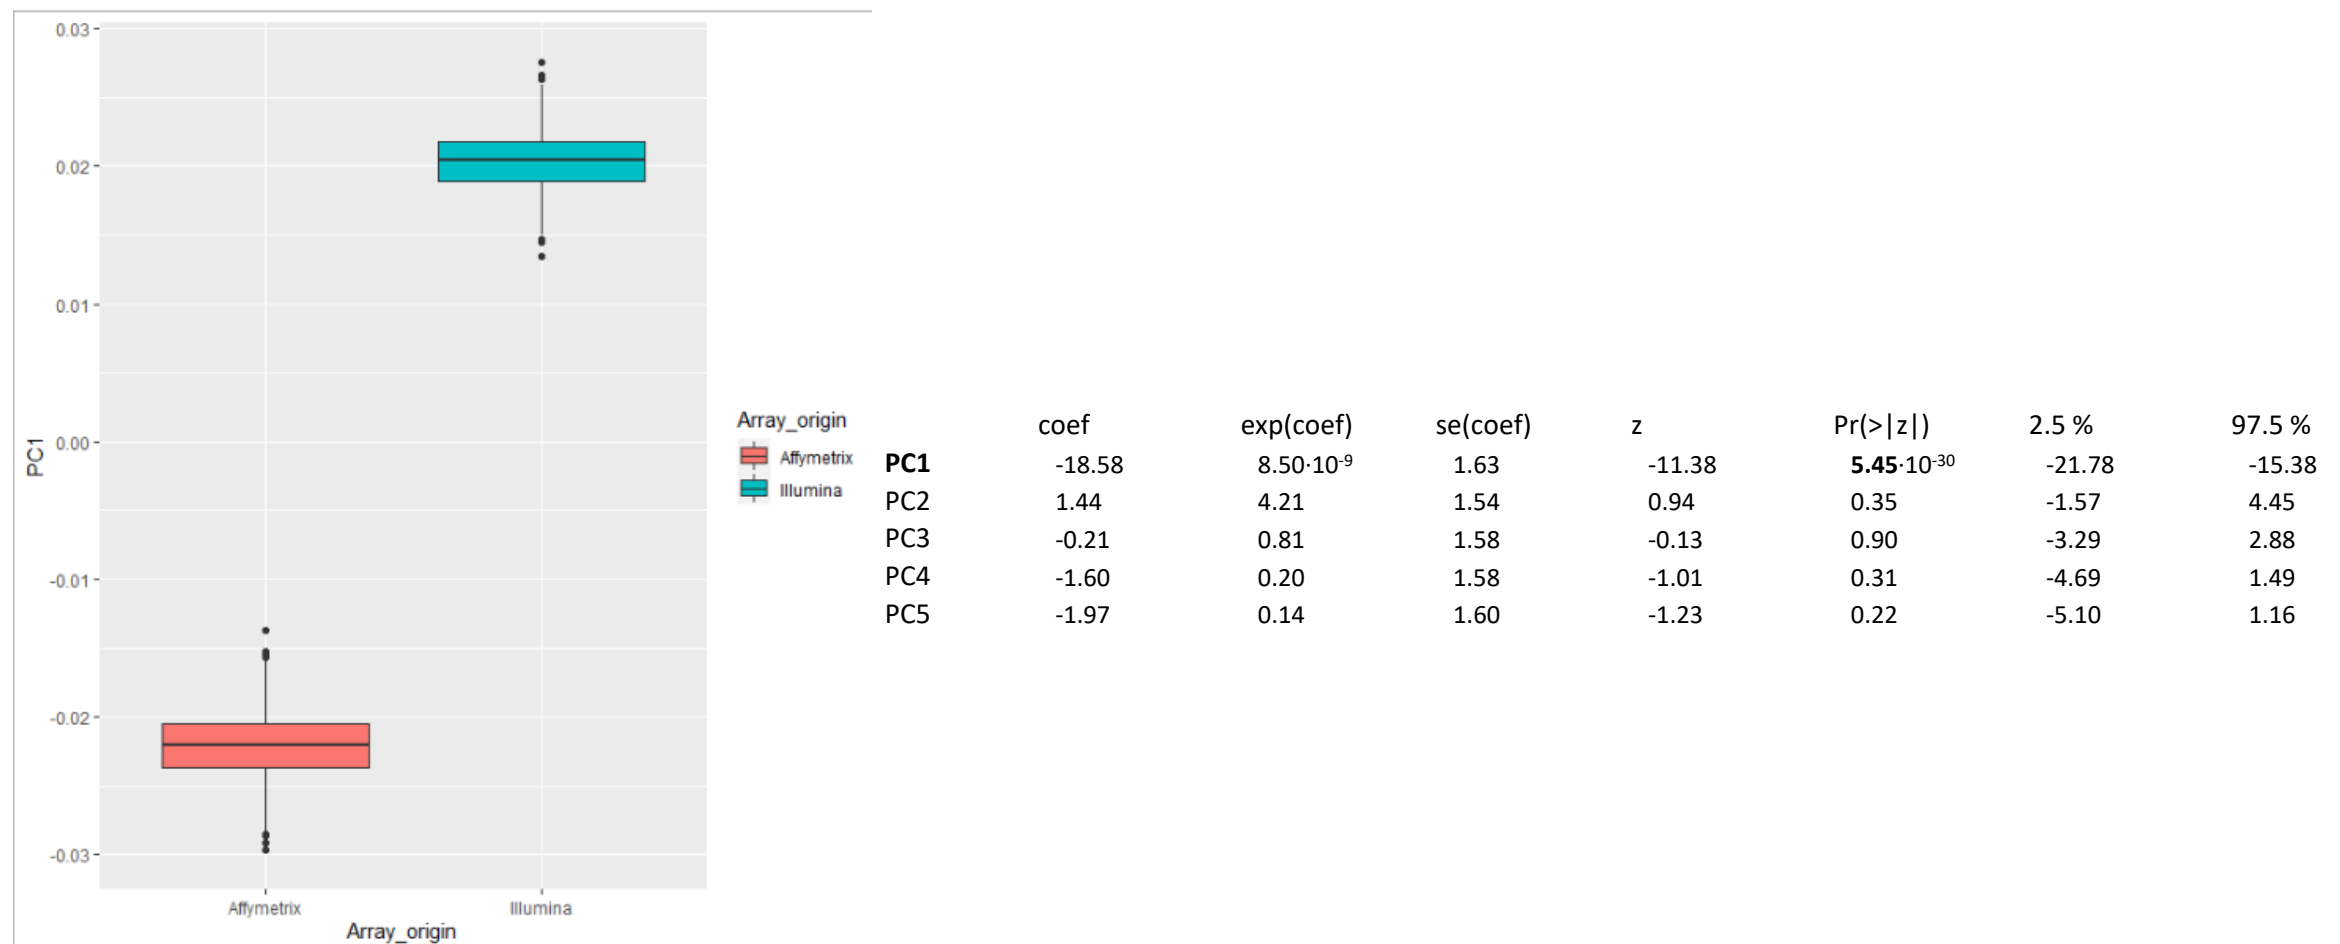

Supplement: s1 [file s1]
