# Supplementary material for: Mendelian Randomisation Confirms the Role of Y-Chromosome Loss in Alzheimer’s Disease Aetiopathogenesis in Men
Source: MDPI journal article supplement (doi:10.3390/ijms24020898), 2023-01-04

**Figure S5. mloy-PRS association with MCI progression to all-cause-dementia and AD-dementia.** Kaplan-Meier plots represent survival curves for individuals classified by mloy-PRS tertiles. Forest plots show the effect sizes of mloy-PRS, age, and *APOE* genotype in the models for conversion to dementia (a) or AD (b) in females and conversion to dementia (c) or AD (d) in males.

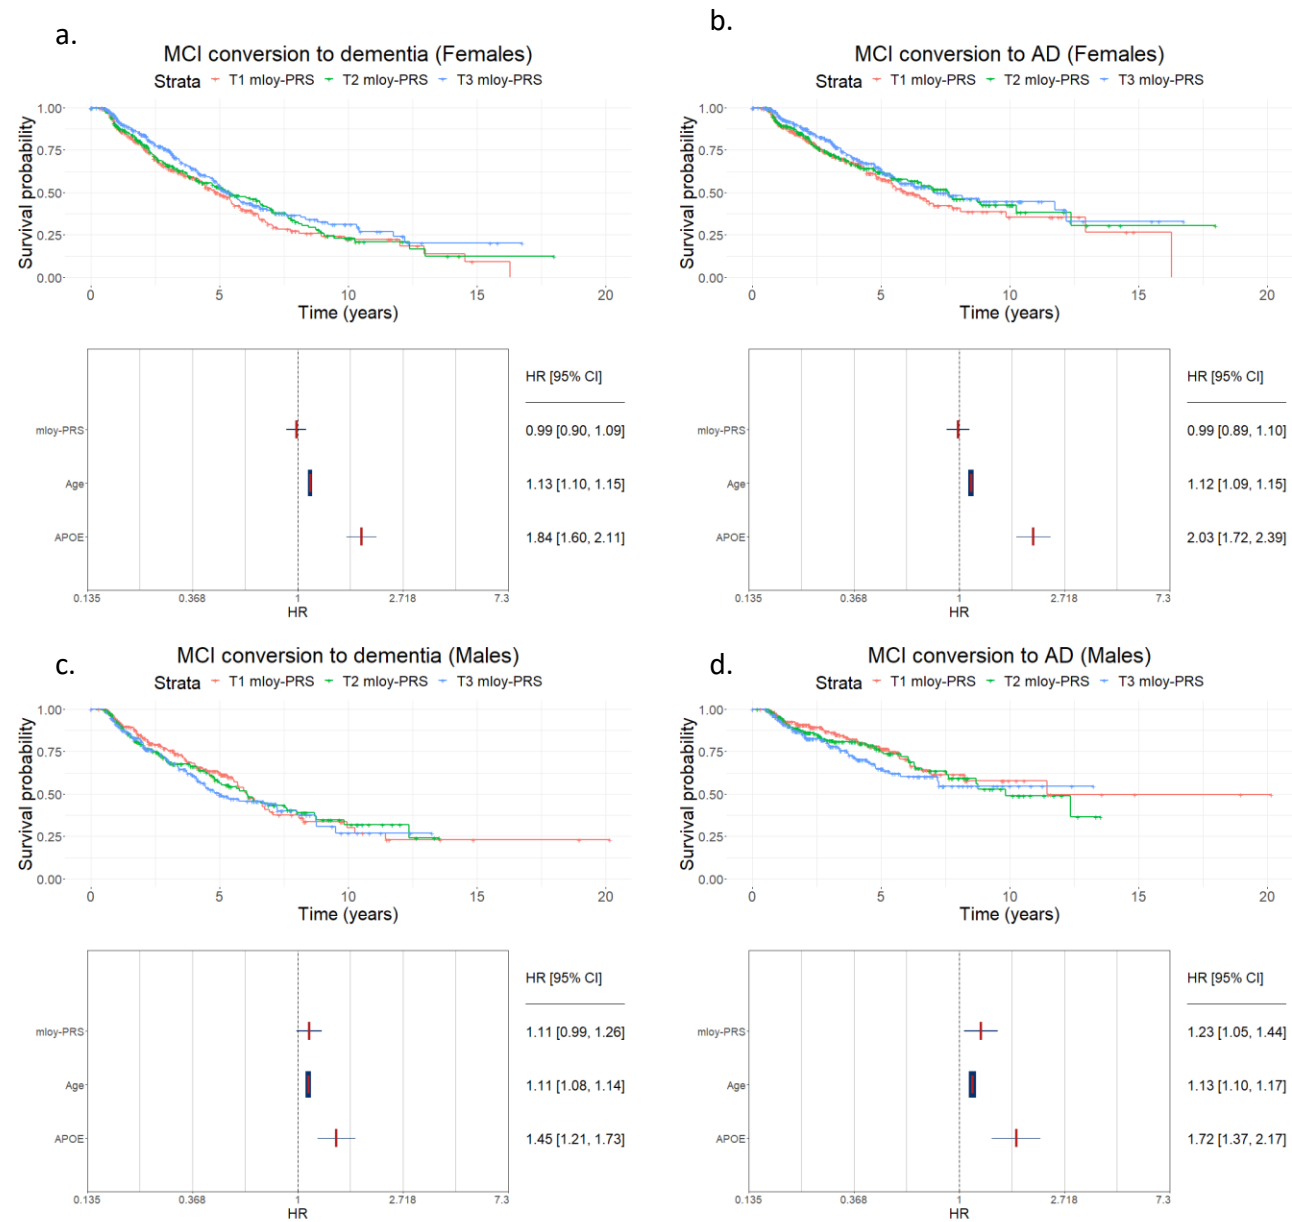

Supplement: s1 [file s1]
