# Supplementary material for: Mendelian Randomisation Confirms the Role of Y-Chromosome Loss in Alzheimer’s Disease Aetiopathogenesis in Men
Source: MDPI journal article supplement (doi:10.3390/ijms24020898), 2023-01-04

**Figure S1. Sex check and representation of mLRR-Y and PAR1-Bdev parameters in the GR@ACE/DEGESCO cohort.** a. Plot of mean log R Ratio for chromosome X (mLRR-X) and chromosome Y (mLRR-Y). The top left corner represents genetically normal XY men, with an observable degradation of mLRR-y values representing individuals with varying degrees of mLOY. Bottom right corner represents genetically normal women (XX) and top right corner Klinefelter (XXY) individuals. A GOY sample (XYY) was also identified above the top left cluster. B-d identification and characterization of outliers of the PAR1 Bdev – mLRRy plot by representation of LRR and B allele

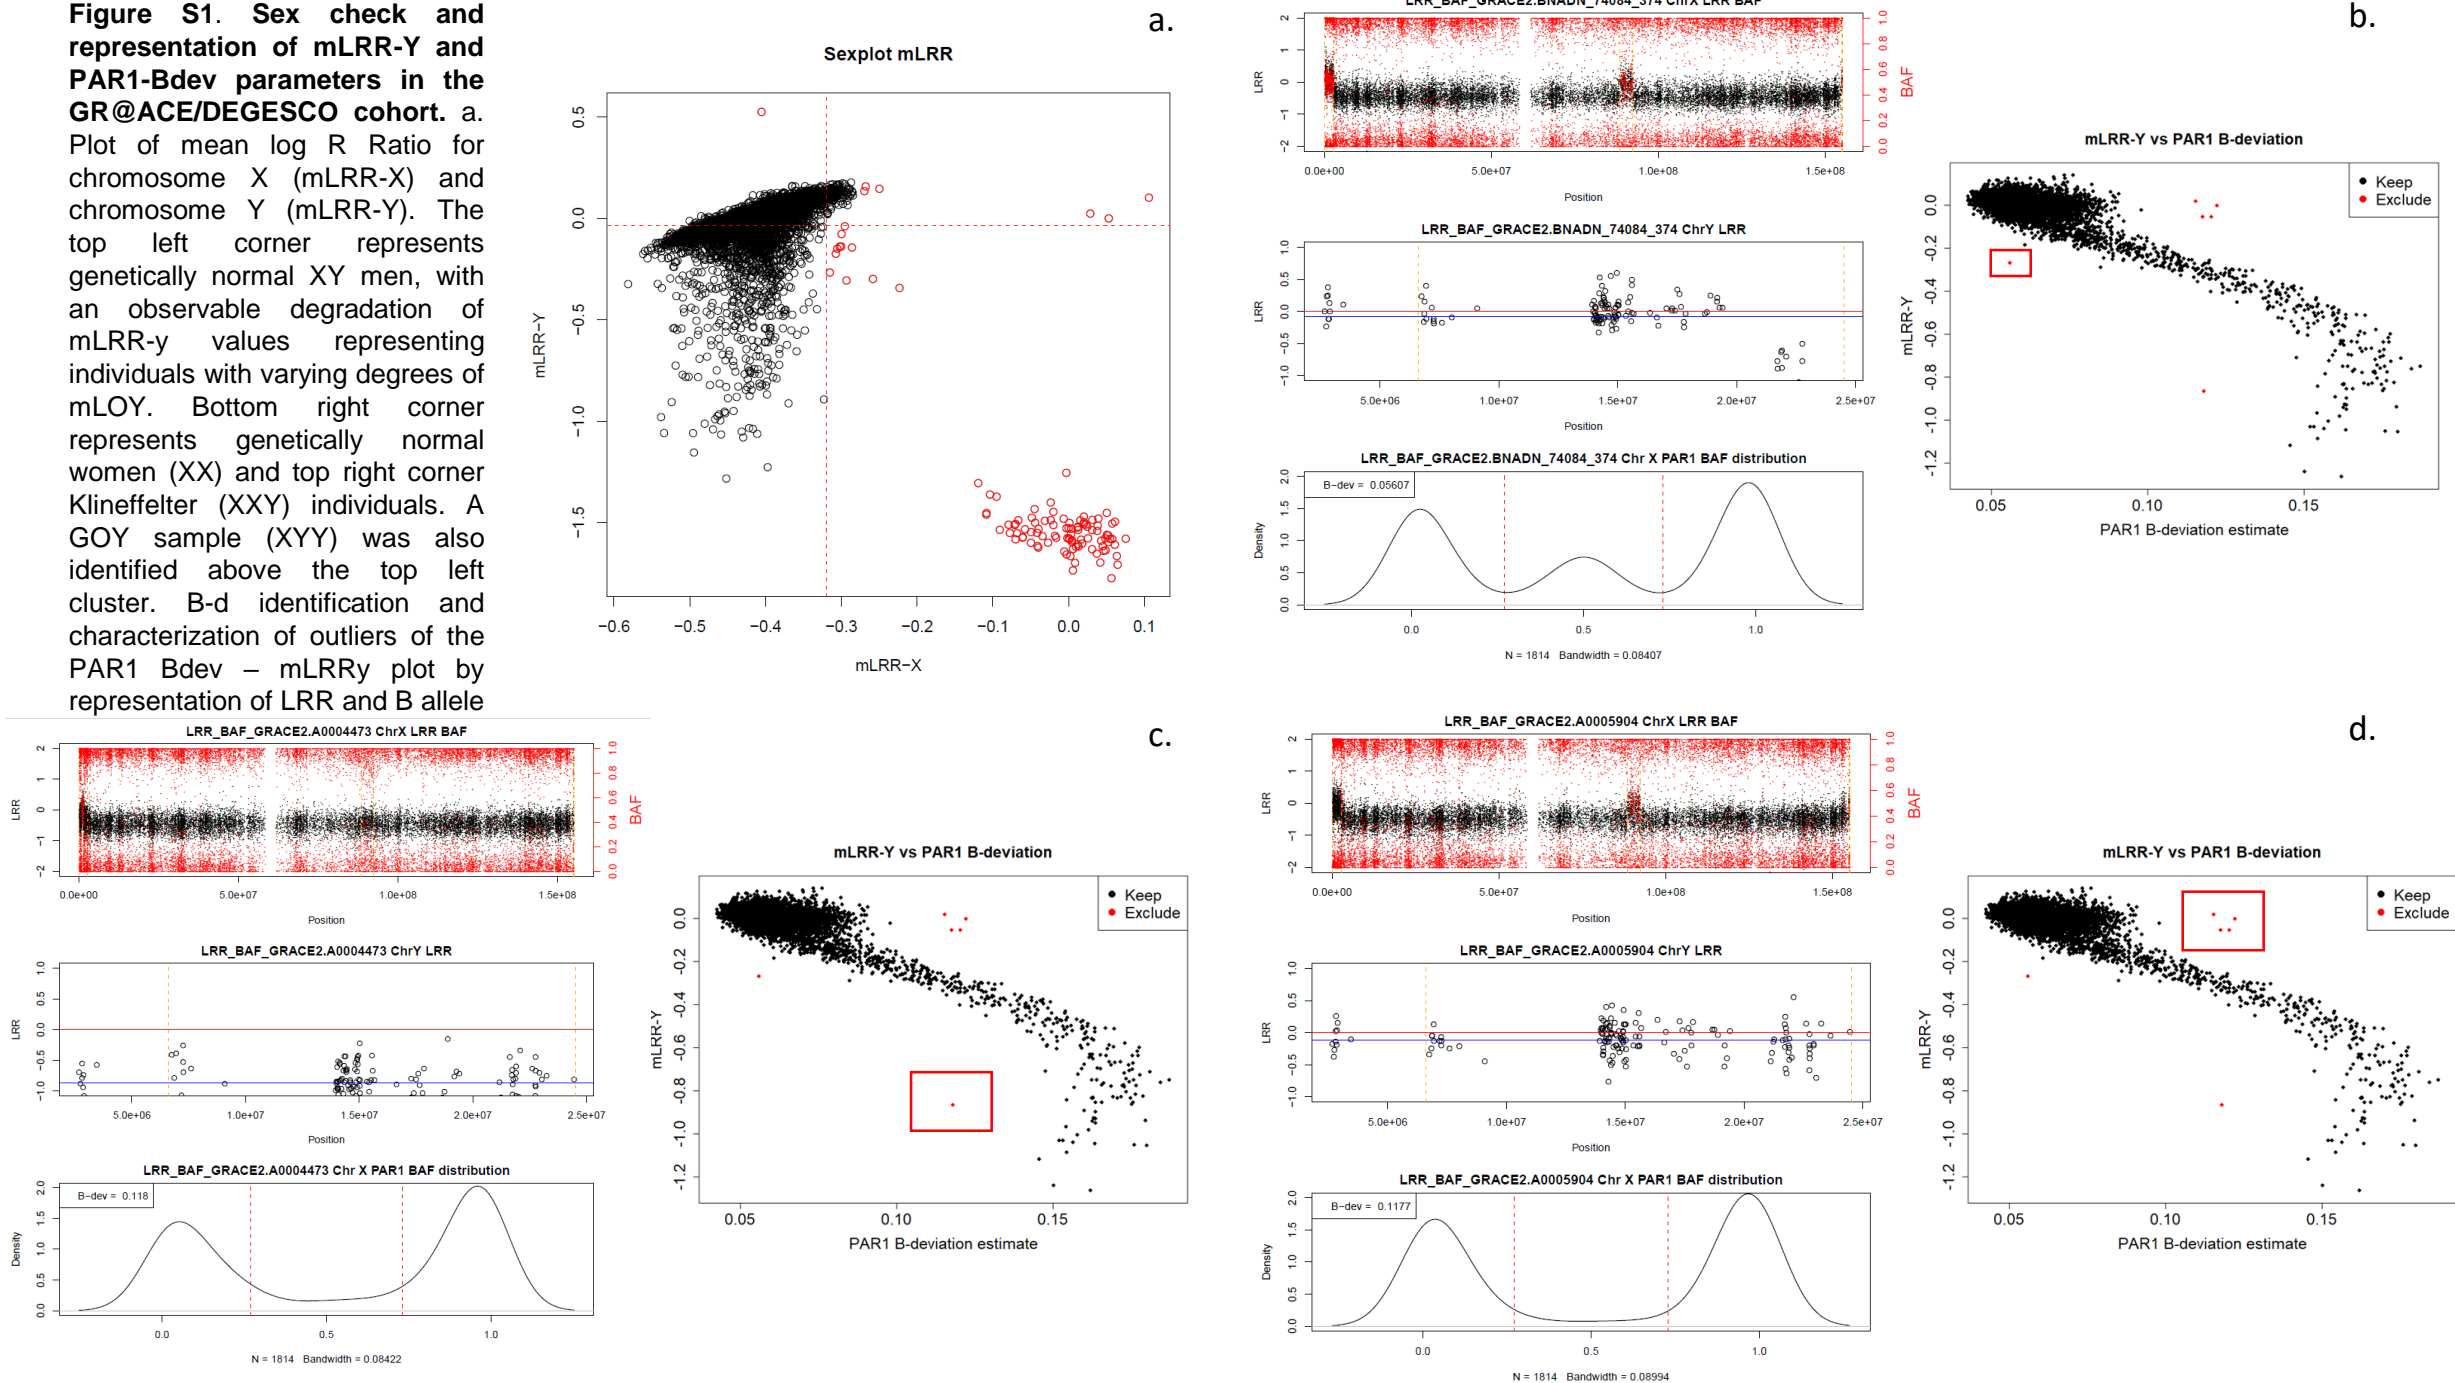

Supplement: s1 [file s1]
