# Supplementary material for: Mendelian Randomisation Confirms the Role of Y-Chromosome Loss in Alzheimer’s Disease Aetiopathogenesis in Men
Source: MDPI journal article supplement (doi:10.3390/ijms24020898), 2023-01-04
Supplement: s1 [file s1]

**Table S6. Logistic regression results for PCs association to AD case-control variable in the mLOY PRS case-control analysis.** Only individuals aged 65-85 were included in the models. OR, odds ratio; SE, standard error; CI2.5, 2.5% quantile; CI97.5, 97.5% quantile.

| <b>ALL<br/>(MALES +<br/>FEMALES)</b> | <b>log(OR)</b> | <b>SE</b> | <b>Z</b> | <b>P</b> | <b>CI2.5</b> | <b>CI97.5</b> |
|--------------------------------------|----------------|-----------|----------|----------|--------------|---------------|
| PC1                                  | -0.89          | 2.32      | -0.38    | 7.02E-01 | -5.46        | 3.65          |
| PC2                                  | -23.80         | 2.37      | -10.05   | 8.74E-24 | -28.46       | -19.18        |
| PC3                                  | -18.71         | 2.41      | -7.77    | 7.68E-15 | -23.45       | -14.01        |
| PC4                                  | 0.32           | 2.34      | 0.14     | 8.93E-01 | -4.27        | 4.90          |
| <b>MALES</b>                         | <b>log(OR)</b> | <b>SE</b> | <b>z</b> | <b>P</b> | <b>CI2.5</b> | <b>CI97.5</b> |
| PC1                                  | -1.56          | 2.38      | -0.65    | 5.12E-01 | -6.21        | 3.14          |
| PC2                                  | -18.38         | 2.46      | -7.47    | 7.78E-14 | -23.23       | -13.59        |
| PC3                                  | 8.62           | 2.43      | 3.55     | 3.83E-04 | 3.87         | 13.39         |
| PC4                                  | -1.91          | 3.09      | -0.62    | 5.36E-01 | -7.96        | 4.14          |
| <b>FEMALES</b>                       | <b>log(OR)</b> | <b>SE</b> | <b>z</b> | <b>P</b> | <b>CI2.5</b> | <b>CI97.5</b> |
| PC1                                  | 1.71           | 2.33      | 0.74     | 4.62E-01 | -2.83        | 6.31          |
| PC2                                  | -14.56         | 2.37      | -6.14    | 8.07E-10 | -19.22       | -9.93         |
| PC3                                  | 12.38          | 2.37      | 5.23     | 1.72E-07 | 7.75         | 17.03         |
| PC4                                  | 3.19           | 2.32      | 1.37     | 1.70E-01 | -1.36        | 7.74          |
