# Supplementary material for: Mendelian Randomisation Confirms the Role of Y-Chromosome Loss in Alzheimer’s Disease Aetiopathogenesis in Men
Source: MDPI journal article supplement (doi:10.3390/ijms24020898), 2023-01-04
Supplement: s1 [file s1]

**Figure S4. Validation and age independence of the mloy-PRS variable.** **a.** PRS tertile distribution across the age spectrum. **b.** Linear regression of age (independent variable) with mLOY PRS (dependent variable) in the 65-85 age group.

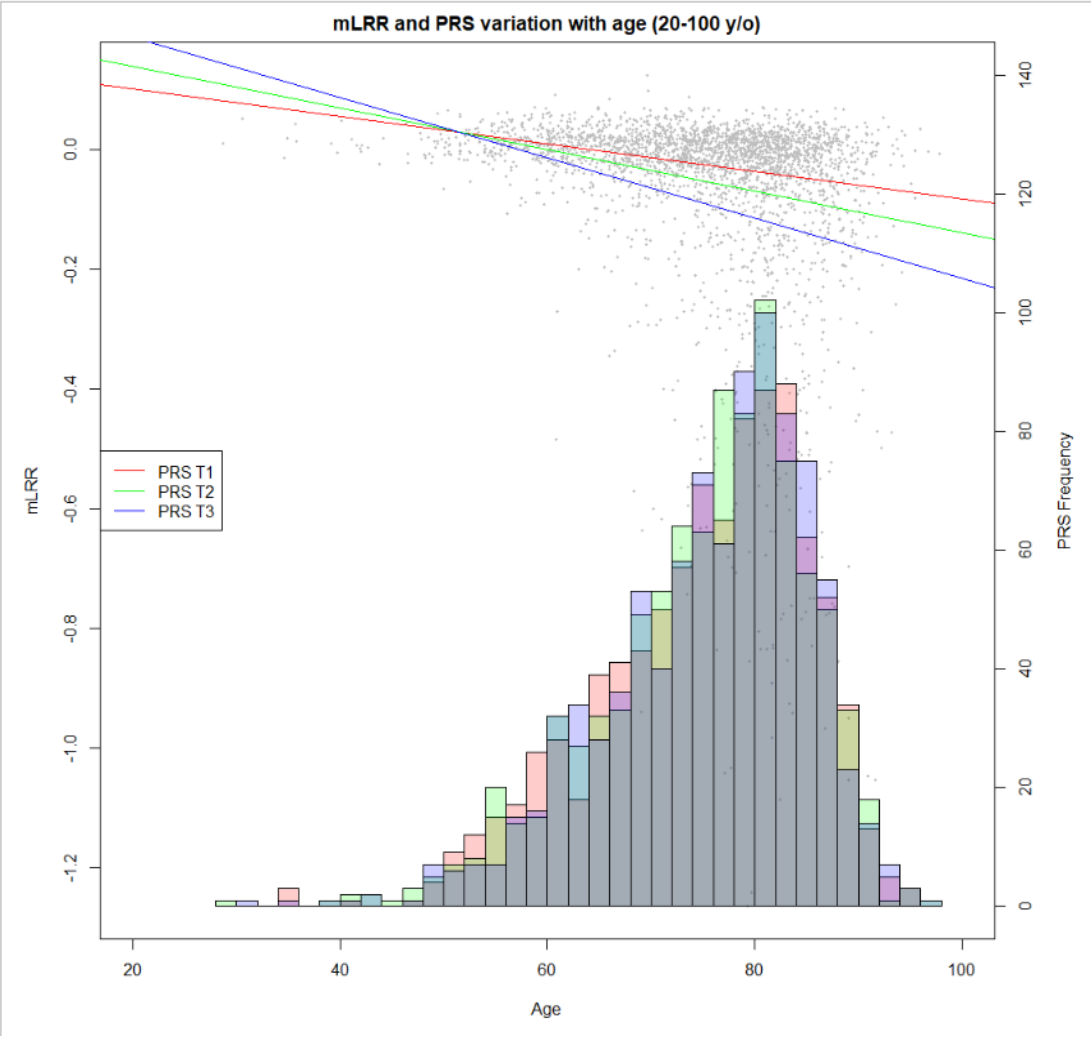

| b.  | Beta | SE   | t    | P    | CI2.5 | CI97.5 |
|-----|------|------|------|------|-------|--------|
| Age | 0.00 | 0.02 | 0.13 | 0.90 | -0.03 | 0.04   |
