# Supplementary material for: Mendelian Randomisation Confirms the Role of Y-Chromosome Loss in Alzheimer’s Disease Aetiopathogenesis in Men
Source: Int J Mol Sci. 2023 Jan 4;24(2):898. doi: 10.3390/ijms24020898 (PMC9863537; doi:10.3390/ijms24020898)
Supplement: Supplementary file 1 [file ijms-24-00898-s001.zip]

Archive with 20 entries (20 files):
- Figure_S1.pdf
- Figure_S2.pdf
- Figure_S3.pdf
- Figure_S4.pdf
- Figure_S5.pdf
- Figure_S6.pdf
- Figure_S7.pdf
- Figure_S8.pdf
- Table_S1.pdf
- Table_S10.xlsx
- Table_S11.pdf
- Table_S12.pdf
- Table_S2.pdf
- Table_S3.pdf
- Table_S4.xlsx
- Table_S5.pdf
- Table_S6.pdf
- Table_S7.xlsx
- Table_S8.xlsx
- Table_S9.xlsx
