# Supplementary material for: Mendelian Randomisation Confirms the Role of Y-Chromosome Loss in Alzheimer’s Disease Aetiopathogenesis in Men
Source: Int J Mol Sci. 2023 Jan 4;24(2):898. doi: 10.3390/ijms24020898 (PMC9863537; doi:10.3390/ijms24020898)
Supplement: Supplementary file 1 [file ijms-24-00898-s001.zip › Table_S8.xlsx]

## Sheet: Hoja1
Table S8: Summary statistics of linear regressions models testing mLRR-Y association with CSF Olink proteins (adjusted by total tau). Models were adjusted by CSF total tau levels, age, time between mLOY assessment and lumbar puncture, and APOE genotype. The 95% confidence interval is presented as the 2.5% quantile and the 97.5% quantile. Adjusted p-values were calculated using the false discovery…
	Protein	Olink panel	Estimate	Std. Error	P	CI 2.5 %	CI 97.5 %	N	P-adj
	IL8	Inflammation	0.04	0.25	0.88	-0.45	0.53	133	0.99
	VEGFA	Inflammation	-0.04	0.24	0.85	-0.52	0.43	133	0.99
	CD8A	Inflammation	0.2	0.34	0.56	-0.48	0.88	133	0.99
	CDCP1	Inflammation	-0.49	0.26	0.06	-1.01	0.03	133	0.99
	CD244	Inflammation	-0.27	0.22	0.23	-0.71	0.17	132	0.99
	IL7	Inflammation	-0.12	0.15	0.4	-0.41	0.17	132	0.99
	OPG	Inflammation	0.02	0.29	0.95	-0.56	0.6	133	0.99
	LAP.TGF.beta.1	Inflammation	0.03	0.24	0.92	-0.46	0.51	133	0.99
	uPA	Inflammation	0.02	0.19	0.93	-0.35	0.39	133	0.99
	IL6	Inflammation	0.12	0.37	0.74	-0.61	0.86	133	0.99
	MCP.1	Inflammation	0.4	0.21	0.05	-0.01	0.81	133	0.99
	CXCL11	Inflammation	-0.55	0.35	0.12	-1.25	0.14	133	0.99
	TRAIL	Inflammation	-0.2	0.14	0.14	-0.47	0.07	133	0.99
	CXCL9	Inflammation	-0.22	0.57	0.71	-1.35	0.91	133	0.99
	CST5	Inflammation	0.02	0.04	0.69	-0.07	0.1	133	0.99
	OSM	Inflammation	-0.12	0.13	0.35	-0.39	0.14	115	0.99
	CXCL1	Inflammation	-0.06	0.34	0.87	-0.72	0.61	133	0.99
	CCL4	Inflammation	0.29	0.28	0.3	-0.26	0.84	133	0.99
	SCF	Inflammation	0.26	0.21	0.22	-0.15	0.66	133	0.99
	IL18	Inflammation	-0.09	0.25	0.72	-0.58	0.4	133	0.99
	TGF.alpha	Inflammation	0.28	0.19	0.15	-0.1	0.65	133	0.99
	MCP.4	Inflammation	0.54	0.32	0.09	-0.08	1.17	133	0.99
	CCL11	Inflammation	0.04	0.18	0.82	-0.32	0.4	133	0.99
	TNFSF14	Inflammation	-0.19	0.15	0.22	-0.49	0.11	126	0.99
	FGF.5	Inflammation	0.26	0.26	0.32	-0.26	0.78	133	0.99
	MMP.1	Inflammation	0	0.46	0.99	-0.91	0.9	133	1
	LIF.R	Inflammation	0.03	0.21	0.89	-0.39	0.45	133	0.99
	CCL19	Inflammation	0.06	0.44	0.9	-0.82	0.93	133	0.99
	IL.10RB	Inflammation	0.07	0.21	0.74	-0.35	0.49	133	0.99
	IL.18R1	Inflammation	-0.09	0.33	0.78	-0.76	0.57	133	0.99
	PD.L1	Inflammation	0.29	0.25	0.24	-0.2	0.77	133	0.99
	CXCL5	Inflammation	0.32	0.21	0.14	-0.11	0.74	133	0.99
	HGF	Inflammation	-0.08	0.22	0.72	-0.51	0.35	133	0.99
	IL.12B	Inflammation	0.14	0.25	0.58	-0.36	0.64	133	0.99
	MMP.10	Inflammation	0.11	0.36	0.76	-0.6	0.82	133	0.99
	TNF	Inflammation	-0.22	0.11	0.06	-0.44	0.01	111	0.99
	CCL23	Inflammation	-0.13	0.23	0.57	-0.59	0.33	133	0.99
	CD5	Inflammation	0.01	0.2	0.95	-0.38	0.4	133	0.99
	CCL3	Inflammation	-0.11	0.22	0.63	-0.55	0.33	133	0.99
	Flt3L	Inflammation	0.14	0.19	0.45	-0.23	0.51	133	0.99
	CXCL6	Inflammation	0.06	0.34	0.85	-0.61	0.73	133	0.99
	CXCL10	Inflammation	0.06	0.39	0.89	-0.72	0.83	133	0.99
	4E.BP1	Inflammation	0.19	0.21	0.37	-0.23	0.6	133	0.99
	SIRT2	Inflammation	0.24	0.21	0.26	-0.18	0.65	106	0.99
	CCL28	Inflammation	-0.19	0.16	0.22	-0.51	0.12	127	0.99
	DNER	Inflammation	0.08	0.08	0.32	-0.08	0.24	133	0.99
	CD40	Inflammation	0.09	0.22	0.68	-0.34	0.52	133	0.99
	FGF.19	Inflammation	0.25	0.31	0.41	-0.36	0.86	133	0.99
	LIF	Inflammation	0.19	0.28	0.5	-0.36	0.74	121	0.99
	MCP.2	Inflammation	0.25	0.33	0.45	-0.4	0.9	133	0.99
	CCL25	Inflammation	-0.07	0.27	0.79	-0.6	0.46	133	0.99
	CX3CL1	Inflammation	-0.02	0.2	0.93	-0.42	0.38	133	0.99
	TNFRSF9	Inflammation	-0.06	0.24	0.79	-0.53	0.4	133	0.99
	TWEAK	Inflammation	0.16	0.22	0.46	-0.27	0.6	133	0.99
	STAMBP	Inflammation	0.07	0.1	0.51	-0.13	0.27	126	0.99
	ADA	Inflammation	0.49	0.31	0.11	-0.12	1.11	133	0.99
	TNFB	Inflammation	-0.34	0.21	0.11	-0.76	0.08	127	0.99
	CSF.1	Inflammation	0.04	0.16	0.79	-0.28	0.37	133	0.99
	NRP2	Neurology	-0.05	0.18	0.79	-0.4	0.3	135	0.99
	MAPT	Neurology	0.28	0.3	0.34	-0.3	0.87	135	0.99
	CADM3	Neurology	-0.03	0.06	0.63	-0.14	0.08	135	0.99
	UNC5C	Neurology	0.3	0.21	0.16	-0.12	0.72	135	0.99
	VWC2	Neurology	0.23	0.25	0.36	-0.26	0.72	135	0.99
	Siglec.9	Neurology	0	0.21	1	-0.42	0.42	135	1
	CLM.6	Neurology	0.17	0.26	0.52	-0.34	0.67	135	0.99
	EZR	Neurology	-0.08	0.15	0.57	-0.37	0.21	135	0.99
	SMOC2	Neurology	0.22	0.32	0.49	-0.41	0.84	135	0.99
	NBL1	Neurology	-0.12	0.11	0.29	-0.33	0.1	135	0.99
	EFNA4	Neurology	-0.23	0.18	0.21	-0.58	0.13	135	0.99
	SCARB2	Neurology	0.18	0.21	0.41	-0.25	0.6	135	0.99
	NCAN	Neurology	-0.05	0.04	0.24	-0.13	0.03	135	0.99
	PRTG	Neurology	-0.03	0.15	0.84	-0.32	0.26	135	0.99
	ROBO2	Neurology	-0.07	0.34	0.84	-0.74	0.6	135	0.99
	CRTAM	Neurology	0.04	0.15	0.76	-0.24	0.33	124	0.99
	RGMA	Neurology	-0.08	0.13	0.51	-0.34	0.17	135	0.99
	PLXNB3	Neurology	-0.03	0.27	0.91	-0.57	0.51	135	0.99
	CPA2	Neurology	-0.56	0.36	0.13	-1.27	0.16	135	0.99
	CD38	Neurology	0.43	0.3	0.15	-0.16	1.02	135	0.99
	SMPD1	Neurology	-0.16	0.25	0.53	-0.65	0.34	135	0.99
	MSR1	Neurology	0.16	0.22	0.47	-0.28	0.6	135	0.99
	Alpha.2.MRAP	Neurology	0.15	0.25	0.53	-0.34	0.65	135	0.99
	sFRP.3	Neurology	0.08	0.08	0.33	-0.08	0.24	135	0.99
	EPHB6	Neurology	0.41	0.34	0.23	-0.27	1.08	135	0.99
	RGMB	Neurology	0.07	0.21	0.72	-0.34	0.49	135	0.99
	SIGLEC1	Neurology	0.36	0.23	0.12	-0.1	0.82	135	0.99
	CNTN5	Neurology	0.06	0.25	0.8	-0.43	0.55	135	0.99
	ADAM.22	Neurology	0.02	0.15	0.91	-0.28	0.32	135	0.99
	CLEC1B	Neurology	0.04	0.2	0.83	-0.35	0.43	122	0.99
	ADAM.23	Neurology	0.15	0.14	0.29	-0.13	0.43	135	0.99
	MATN3	Neurology	0.53	0.27	0.05	-0.01	1.06	135	0.99
	gal.8	Neurology	0.48	0.22	0.03	0.05	0.91	135	0.99
	BCAN	Neurology	-0.03	0.05	0.51	-0.12	0.06	135	0.99
	LAYN	Neurology	0.17	0.31	0.59	-0.45	0.78	135	0.99
	NEP	Neurology	0.06	0.19	0.77	-0.33	0.44	135	0.99
	GDF.8	Neurology	-0.03	0.19	0.86	-0.4	0.34	135	0.99
	THY.1	Neurology	-0.04	0.04	0.34	-0.12	0.04	135	0.99
	TMPRSS5	Neurology	-0.3	0.32	0.35	-0.94	0.34	135	0.99
	CDH3	Neurology	0	0.08	0.95	-0.16	0.15	135	0.99
	GFR.alpha.1	Neurology	0.11	0.21	0.6	-0.3	0.53	135	0.99
	GM.CSF.R.alpha	Neurology	-0.32	0.52	0.54	-1.36	0.71	135	0.99
	Beta.NGF	Neurology	0.21	0.16	0.2	-0.11	0.54	135	0.99
	SCARA5	Neurology	0.33	0.25	0.19	-0.17	0.84	135	0.99
	CD200	Neurology	-0.12	0.28	0.66	-0.68	0.43	135	0.99
	NTRK2	Neurology	-0.02	0.18	0.9	-0.38	0.33	135	0.99
	GZMA	Neurology	0.3	0.26	0.25	-0.22	0.82	135	0.99
	DRAXIN	Neurology	-0.04	0.25	0.89	-0.53	0.46	135	0.99
	SCARF2	Neurology	0.13	0.2	0.51	-0.26	0.52	135	0.99
	GDNFR.alpha.3	Neurology	0	0.25	1	-0.5	0.5	135	1
	PVR	Neurology	-0.11	0.26	0.69	-0.63	0.41	135	0.99
	TNFRSF12A	Neurology	0.14	0.2	0.5	-0.27	0.54	135	0.99
	SKR3	Neurology	0.1	0.23	0.66	-0.35	0.55	135	0.99
	FLRT2	Neurology	0.19	0.2	0.34	-0.2	0.58	135	0.99
	CPM	Neurology	-0.36	0.33	0.28	-1.02	0.29	135	0.99
	GCP5	Neurology	-0.05	0.27	0.84	-0.59	0.48	135	0.99
	BMP.4	Neurology	0	0.26	0.99	-0.5	0.51	135	1
	MDGA1	Neurology	0.07	0.42	0.86	-0.75	0.9	135	0.99
	PDGF.R.alpha	Neurology	0.03	0.22	0.9	-0.4	0.46	135	0.99
	CTSC	Neurology	-0.16	0.3	0.59	-0.75	0.43	135	0.99
	CDH6	Neurology	0.09	0.24	0.7	-0.39	0.57	135	0.99
	DDR1	Neurology	-0.24	0.24	0.33	-0.72	0.25	135	0.99
	JAM.B	Neurology	0.13	0.17	0.45	-0.21	0.46	135	0.99
	CTSS	Neurology	-0.01	0.12	0.91	-0.25	0.22	135	0.99
	N.CDase	Neurology	-0.32	0.19	0.1	-0.69	0.06	134	0.99
	NAAA	Neurology	0.15	0.23	0.52	-0.31	0.61	135	0.99
	N2DL.2	Neurology	-0.12	0.4	0.76	-0.91	0.67	135	0.99
	PLXNB1	Neurology	0.16	0.22	0.47	-0.28	0.61	135	0.99
	TNFRSF21	Neurology	0.02	0.09	0.84	-0.17	0.2	135	0.99
	CLM.1	Neurology	-0.2	0.47	0.67	-1.13	0.74	135	0.99
	SPOCK1	Neurology	-0.16	0.18	0.37	-0.53	0.2	135	0.99
	IL12	Neurology	0.12	0.28	0.67	-0.44	0.68	135	0.99
	Dkk.4	Neurology	0.21	0.23	0.37	-0.25	0.66	135	0.99
	EDA2R	Neurology	0	0.27	0.99	-0.54	0.54	134	1
	NTRK3	Neurology	0.09	0.25	0.71	-0.4	0.59	135	0.99
	LAIR.2	Neurology	0.11	0.89	0.9	-1.66	1.87	133	0.99
	MANF	Neurology	0.14	0.18	0.41	-0.2	0.49	135	0.99
	TN.R	Neurology	-0.2	0.17	0.22	-0.53	0.13	135	0.99
	Nr.CAM	Neurology	-0.06	0.06	0.35	-0.17	0.06	135	0.99
	KYNU	Neurology	0.25	0.25	0.33	-0.25	0.75	135	0.99
