# Supplementary material for: Mendelian Randomisation Confirms the Role of Y-Chromosome Loss in Alzheimer’s Disease Aetiopathogenesis in Men
Source: Int J Mol Sci. 2023 Jan 4;24(2):898. doi: 10.3390/ijms24020898 (PMC9863537; doi:10.3390/ijms24020898)
Supplement: Supplementary file 1 [file ijms-24-00898-s001.zip › Table_S10.xlsx]

## Sheet: Hoja1
Table S10: Summary statistics of linear regressions models testing mLRR-Y association with plasma Olink proteins (adjusted by total tau). Models were adjusted by CSF total tau levels, age, time between mLOY assessment and lumbar puncture, and APOE genotype. The 95% confidence interval is presented as the 2.5% quantile and the 97.5% quantile. Adjusted p-values were calculated using the false disco…
	Protein	Olink panel	Estimate	Std. Error	P	CI 2.5 %	CI 97.5 %	N	P-adj
	IL8	Inflammation	0.17	0.32	0.6	-0.47	0.81	133	0.97
	VEGFA	Inflammation	0.1	0.23	0.66	-0.36	0.56	133	0.97
	CD8A	Inflammation	-0.29	0.43	0.5	-1.13	0.55	133	0.97
	MCP.3	Inflammation	0.06	0.31	0.84	-0.55	0.68	132	0.98
	GDNF	Inflammation	0.24	0.24	0.31	-0.23	0.71	133	0.97
	CDCP1	Inflammation	-0.14	0.32	0.65	-0.78	0.49	133	0.97
	CD244	Inflammation	0.07	0.28	0.8	-0.48	0.62	133	0.97
	IL7	Inflammation	0.5	0.41	0.22	-0.31	1.3	133	0.97
	OPG	Inflammation	0.07	0.2	0.71	-0.31	0.46	133	0.97
	LAP.TGF.beta.1	Inflammation	0.36	0.23	0.12	-0.1	0.82	133	0.97
	uPA	Inflammation	0.33	0.19	0.09	-0.06	0.71	133	0.97
	IL6	Inflammation	0.64	0.52	0.22	-0.39	1.66	133	0.97
	IL.17C	Inflammation	0.12	0.43	0.79	-0.74	0.97	119	0.97
	MCP.1	Inflammation	0.13	0.28	0.64	-0.42	0.69	133	0.97
	IL.17A	Inflammation	-0.31	0.42	0.46	-1.14	0.52	116	0.97
	CXCL11	Inflammation	0.41	0.53	0.44	-0.63	1.44	133	0.97
	AXIN1	Inflammation	0.58	0.71	0.41	-0.82	1.99	133	0.97
	TRAIL	Inflammation	0.19	0.16	0.23	-0.13	0.52	133	0.97
	CXCL9	Inflammation	0.12	0.45	0.8	-0.77	1	133	0.97
	CST5	Inflammation	0.19	0.34	0.59	-0.49	0.86	133	0.97
	OSM	Inflammation	0.6	0.53	0.26	-0.45	1.65	133	0.97
	CXCL1	Inflammation	1.02	0.47	0.03	0.09	1.95	133	0.97
	CCL4	Inflammation	0.44	0.38	0.25	-0.31	1.19	133	0.97
	CD6	Inflammation	-0.1	0.28	0.73	-0.65	0.45	133	0.97
	SCF	Inflammation	0.08	0.22	0.73	-0.36	0.52	133	0.97
	IL18	Inflammation	-0.14	0.33	0.68	-0.79	0.51	133	0.97
	SLAMF1	Inflammation	0.05	0.24	0.82	-0.43	0.54	115	0.98
	TGF.alpha	Inflammation	0.17	0.19	0.35	-0.19	0.54	133	0.97
	MCP.4	Inflammation	0.19	0.35	0.58	-0.5	0.89	133	0.97
	CCL11	Inflammation	0.09	0.26	0.73	-0.42	0.61	133	0.97
	TNFSF14	Inflammation	0.37	0.32	0.25	-0.26	1.01	133	0.97
	FGF.23	Inflammation	0.12	0.33	0.72	-0.53	0.77	132	0.97
	IL.10RA	Inflammation	0.55	0.52	0.3	-0.49	1.59	109	0.97
	FGF.5	Inflammation	0.19	0.12	0.11	-0.04	0.43	119	0.97
	MMP.1	Inflammation	0.02	0.56	0.97	-1.09	1.13	133	1
	LIF.R	Inflammation	0.24	0.18	0.19	-0.12	0.59	133	0.97
	FGF.21	Inflammation	-0.58	0.81	0.48	-2.17	1.02	133	0.97
	CCL19	Inflammation	0.44	0.47	0.36	-0.5	1.37	133	0.97
	IL.15RA	Inflammation	0.12	0.18	0.52	-0.24	0.48	133	0.97
	IL.10RB	Inflammation	0.09	0.21	0.67	-0.33	0.51	133	0.97
	IL.18R1	Inflammation	-0.04	0.27	0.89	-0.58	0.5	133	0.99
	PD.L1	Inflammation	0.15	0.25	0.55	-0.34	0.64	133	0.97
	CXCL5	Inflammation	1.62	0.66	0.02	0.31	2.94	133	0.97
	TRANCE	Inflammation	0.65	0.35	0.06	-0.04	1.34	133	0.97
	HGF	Inflammation	0.25	0.21	0.25	-0.17	0.67	133	0.97
	IL.12B	Inflammation	0.34	0.44	0.44	-0.53	1.22	133	0.97
	MMP.10	Inflammation	0.67	0.4	0.1	-0.12	1.47	133	0.97
	IL10	Inflammation	0.07	0.38	0.86	-0.69	0.82	133	0.98
	TNF	Inflammation	-0.16	0.28	0.56	-0.71	0.39	133	0.97
	CCL23	Inflammation	0	0.27	0.99	-0.52	0.53	133	1
	CD5	Inflammation	0.19	0.25	0.45	-0.31	0.69	133	0.97
	CCL3	Inflammation	0.03	0.34	0.93	-0.63	0.69	133	0.99
	Flt3L	Inflammation	0.37	0.29	0.2	-0.2	0.94	133	0.97
	CXCL6	Inflammation	0.37	0.44	0.4	-0.49	1.23	133	0.97
	CXCL10	Inflammation	0	0.39	0.99	-0.77	0.78	133	1
	4E.BP1	Inflammation	0.59	0.48	0.22	-0.36	1.54	133	0.97
	SIRT2	Inflammation	0.66	0.74	0.37	-0.81	2.13	132	0.97
	CCL28	Inflammation	-0.03	0.3	0.93	-0.63	0.57	133	0.99
	DNER	Inflammation	0.28	0.16	0.09	-0.04	0.6	133	0.97
	EN.RAGE	Inflammation	0.85	0.47	0.07	-0.07	1.78	133	0.97
	CD40	Inflammation	0.23	0.27	0.39	-0.3	0.75	133	0.97
	IFN.gamma	Inflammation	0.31	0.55	0.58	-0.79	1.4	133	0.97
	FGF.19	Inflammation	0.42	0.59	0.47	-0.74	1.59	133	0.97
	MCP.2	Inflammation	0.3	0.41	0.47	-0.51	1.11	133	0.97
	CASP.8	Inflammation	0.21	0.24	0.4	-0.27	0.69	133	0.97
	CCL25	Inflammation	0.37	0.29	0.2	-0.2	0.95	133	0.97
	CX3CL1	Inflammation	0.33	0.27	0.21	-0.19	0.86	133	0.97
	TNFRSF9	Inflammation	0.06	0.32	0.86	-0.57	0.69	133	0.98
	NT.3	Inflammation	0.1	0.26	0.71	-0.42	0.61	133	0.97
	TWEAK	Inflammation	0.21	0.19	0.27	-0.16	0.57	133	0.97
	CCL20	Inflammation	0.7	0.57	0.22	-0.43	1.82	133	0.97
	ST1A1	Inflammation	0.28	0.46	0.55	-0.64	1.19	132	0.97
	STAMBP	Inflammation	0.76	0.6	0.21	-0.43	1.95	133	0.97
	ADA	Inflammation	0	0.27	1	-0.53	0.53	133	1
	TNFB	Inflammation	0.17	0.27	0.52	-0.35	0.69	133	0.97
	CSF.1	Inflammation	0.1	0.14	0.47	-0.18	0.38	133	0.97
	NMNAT1	Neurology	-0.36	0.36	0.32	-1.07	0.36	131	0.97
	NRP2	Neurology	-0.02	0.16	0.91	-0.34	0.3	131	0.99
	CADM3	Neurology	0.16	0.34	0.63	-0.51	0.83	131	0.97
	GDNF	Neurology	0.16	0.25	0.51	-0.32	0.65	131	0.97
	UNC5C	Neurology	0.49	0.27	0.07	-0.04	1.01	131	0.97
	VWC2	Neurology	0.15	0.34	0.65	-0.51	0.82	131	0.97
	Siglec.9	Neurology	-0.03	0.21	0.89	-0.45	0.39	131	0.99
	CLM.6	Neurology	0.43	0.21	0.04	0.01	0.85	131	0.97
	EZR	Neurology	0.06	0.15	0.69	-0.23	0.35	131	0.97
	SMOC2	Neurology	0.32	0.28	0.25	-0.24	0.88	131	0.97
	NBL1	Neurology	-0.01	0.06	0.91	-0.13	0.11	131	0.99
	EFNA4	Neurology	-0.14	0.23	0.55	-0.59	0.31	131	0.97
	SCARB2	Neurology	-0.01	0.27	0.98	-0.55	0.53	131	1
	NCAN	Neurology	-0.21	0.19	0.28	-0.59	0.17	131	0.97
	PRTG	Neurology	0.11	0.21	0.59	-0.3	0.52	131	0.97
	ROBO2	Neurology	0.01	0.3	0.98	-0.58	0.59	131	1
	CRTAM	Neurology	-0.39	0.31	0.22	-1.01	0.23	131	0.97
	RGMA	Neurology	0.18	0.21	0.39	-0.24	0.6	131	0.97
	PLXNB3	Neurology	0.63	0.36	0.08	-0.09	1.34	131	0.97
	CPA2	Neurology	-0.32	0.41	0.44	-1.13	0.5	131	0.97
	CD38	Neurology	0.26	0.24	0.27	-0.21	0.73	131	0.97
	SMPD1	Neurology	-0.08	0.29	0.79	-0.66	0.5	131	0.97
	MSR1	Neurology	0.08	0.24	0.74	-0.39	0.55	131	0.97
	Alpha.2.MRAP	Neurology	0.21	0.47	0.66	-0.73	1.15	131	0.97
	sFRP.3	Neurology	0.07	0.24	0.78	-0.41	0.54	131	0.97
	EPHB6	Neurology	0.31	0.24	0.2	-0.17	0.79	131	0.97
	RGMB	Neurology	0.18	0.25	0.46	-0.31	0.67	131	0.97
	SIGLEC1	Neurology	0.04	0.28	0.88	-0.51	0.6	131	0.98
	CNTN5	Neurology	-0.11	0.31	0.72	-0.73	0.5	131	0.97
	ADAM.22	Neurology	0.05	0.3	0.88	-0.54	0.63	131	0.98
	CLEC1B	Neurology	0.89	0.49	0.07	-0.08	1.86	131	0.97
	ADAM.23	Neurology	0.43	0.31	0.17	-0.18	1.05	131	0.97
	MATN3	Neurology	0.67	0.29	0.02	0.11	1.24	131	0.97
	RSPO1	Neurology	-0.24	0.25	0.33	-0.74	0.25	131	0.97
	HAGH	Neurology	0.47	0.4	0.25	-0.33	1.27	131	0.97
	LXN	Neurology	0.16	0.09	0.08	-0.02	0.34	130	0.97
	gal.8	Neurology	0.99	0.44	0.03	0.11	1.87	131	0.97
	BCAN	Neurology	-0.42	0.3	0.17	-1.02	0.18	131	0.97
	LAYN	Neurology	0.03	0.29	0.92	-0.55	0.61	131	0.99
	NEP	Neurology	-0.66	0.49	0.18	-1.64	0.31	131	0.97
	GDF.8	Neurology	0.46	0.34	0.18	-0.22	1.13	131	0.97
	THY.1	Neurology	-0.05	0.2	0.78	-0.44	0.34	131	0.97
	WFIKKN1	Neurology	0.01	0.27	0.96	-0.52	0.54	131	1
	TMPRSS5	Neurology	0.12	0.25	0.64	-0.38	0.61	131	0.97
	CDH3	Neurology	-0.02	0.23	0.94	-0.48	0.44	131	0.99
	GFR.alpha.1	Neurology	-0.09	0.27	0.73	-0.62	0.44	131	0.97
	GM_CSF_R_alpha	Neurology	-1.04	0.5	0.04	-2.02	-0.05	131	0.97
	Beta.NGF	Neurology	0.04	0.17	0.8	-0.29	0.37	131	0.97
	SCARA5	Neurology	0.14	0.18	0.44	-0.21	0.48	131	0.97
	CD200	Neurology	0.09	0.24	0.71	-0.39	0.56	131	0.97
	NTRK2	Neurology	0.04	0.15	0.79	-0.26	0.34	131	0.97
	GZMA	Neurology	0	0.25	0.98	-0.49	0.5	130	1
	G_CSF	Neurology	-0.07	0.31	0.82	-0.69	0.55	131	0.98
	DRAXIN	Neurology	-0.1	0.3	0.74	-0.7	0.5	131	0.97
	SCARF2	Neurology	0.02	0.21	0.93	-0.4	0.44	131	0.99
	GDNFR.alpha.3	Neurology	0.13	0.25	0.59	-0.36	0.63	131	0.97
	PVR	Neurology	-0.2	0.19	0.31	-0.58	0.18	131	0.97
	TNFRSF12A	Neurology	-0.2	0.25	0.43	-0.7	0.3	131	0.97
	SKR3	Neurology	0.05	0.23	0.82	-0.4	0.51	131	0.98
	FLRT2	Neurology	0.11	0.2	0.58	-0.28	0.51	131	0.97
	CPM	Neurology	-0.05	0.13	0.7	-0.3	0.2	131	0.97
	CLEC10A	Neurology	0.12	0.29	0.68	-0.45	0.69	131	0.97
	GCP5	Neurology	0.23	0.36	0.53	-0.48	0.93	131	0.97
	BMP.4	Neurology	0.1	0.17	0.56	-0.24	0.44	131	0.97
	FcRL2	Neurology	-0.44	0.46	0.34	-1.34	0.47	131	0.97
	MDGA1	Neurology	0.53	0.47	0.26	-0.39	1.46	131	0.97
	IL.5R.alpha	Neurology	0.59	0.43	0.17	-0.26	1.44	131	0.97
	PDGF.R.alpha	Neurology	0.11	0.2	0.57	-0.27	0.5	131	0.97
	CTSC	Neurology	-0.16	0.3	0.6	-0.76	0.44	131	0.97
	CDH6	Neurology	-0.09	0.19	0.62	-0.47	0.28	131	0.97
	DDR1	Neurology	0	0.17	0.98	-0.35	0.34	131	1
	JAM.B	Neurology	0.04	0.26	0.87	-0.47	0.55	131	0.98
	CTSS	Neurology	0.16	0.12	0.18	-0.07	0.4	131	0.97
	N.CDase	Neurology	-0.09	0.36	0.8	-0.8	0.62	131	0.97
	NAAA	Neurology	0.1	0.37	0.79	-0.63	0.82	131	0.97
	N2DL.2	Neurology	-0.19	0.32	0.55	-0.82	0.44	131	0.97
	PLXNB1	Neurology	-0.12	0.37	0.74	-0.86	0.61	131	0.97
	TNFRSF21	Neurology	-0.09	0.18	0.6	-0.44	0.26	131	0.97
	CLM.1	Neurology	-0.37	0.47	0.43	-1.31	0.56	131	0.97
	SPOCK1	Neurology	-0.11	0.23	0.62	-0.57	0.34	131	0.97
	IL12	Neurology	0.16	0.48	0.74	-0.78	1.1	131	0.97
	Dkk.4	Neurology	-0.12	0.32	0.72	-0.75	0.52	131	0.97
	EDA2R	Neurology	-0.09	0.29	0.77	-0.67	0.49	130	0.97
	LAT	Neurology	0.95	0.66	0.16	-0.36	2.25	131	0.97
	NTRK3	Neurology	0.04	0.22	0.85	-0.39	0.47	131	0.98
	LAIR.2	Neurology	-0.13	0.75	0.86	-1.62	1.36	126	0.98
	MANF	Neurology	0.59	0.51	0.25	-0.42	1.61	131	0.97
	TN.R	Neurology	-0.94	0.39	0.02	-1.7	-0.18	131	0.97
	CD200R1	Neurology	-0.06	0.25	0.8	-0.56	0.43	131	0.97
	Nr.CAM	Neurology	-0.08	0.15	0.61	-0.38	0.22	131	0.97
	KYNU	Neurology	0.33	0.34	0.33	-0.34	1.01	131	0.97
